# Supplementary material for: Influencing factors of pregnancy loss and survival probability of clinical pregnancies conceived through assisted reproductive technology
Source: Reprod Biol Endocrinol. 2018 Aug 7;16:74. doi: 10.1186/s12958-018-0390-6 (PMC6081896; doi:10.1186/s12958-018-0390-6)
Supplement: Supplementary file 1 — Table S1. Cox analysis of risk of pregnancy loss throughout pregnancy in ART clinical pregnancies stratified by two fertility centers. (DOC 103 kb) [file 12958_2018_390_MOESM1_ESM.doc]

Table 1. Cox analysis of risk of pregnancy loss throughout pregnancy in ART clinical pregnancies stratified by two fertility centers.

| **Variables** | **Nanjing** | | | |  |  | **Changzhou** | |  |  |
| --- | --- | --- | --- | --- | --- | --- | --- | --- | --- | --- |
| **No. of**  **PL /total**  **(534/ 4165)** | **PL rate** | **HR (95% CI)*a*** | ***Pa*** |  | **No. of**  **PL /total**  **(151/ 1320)** | **PL rate** | **HR (95% CI)*a*** | ***Pa*** | ***Pb*** |
| **Maternal age** |  |  |  |  |  |  |  |  |  |  |
| <30 | 237/1991 | 12.1% | 1.00[Reference] |  |  | 55/565 | 9.9% | 1.00[Reference] |  |  |
| 30-35 | 220/1784 | 12.6% | 1.04(0.87-1.25) | 0.652 |  | 63/577 | 11.4% | 1.13(0.79-1.63) | 0.502 | 0.693 |
| 36-40 | 63/352 | 18.2% | 1.57(1.19-2.08) | **0.001** |  | 21/120 | 17.5% | 1.90(1.15-3.14) | **0.013** | 0.521 |
| >40 | 14/38 | 36.8% | 3.78(2.21-6.49) | **<0.001** |  | 6/15 | 40.0% | 5.58(2.40-12.95) | **<0.001** | 0.448 |
| Ptrend |  |  | 1.27(1.13-1.43) | **<0.001** |  |  |  | 1.46(1.17-1.82) | **0.001** | 0.273 |
| **Maternal BMI** |  |  |  |  |  |  |  |  |  |  |
| <18.5 | 42/395 | 10.6% | 0.92 (0.67-1.26) | 0.597 |  | 8/114 | 7.0% | 0.60(0.29-1.22) | 0.138 | 0.284 |
| 18.5-25 | 369/3048 | 12.1% | 1.00[Reference] |  |  | 118/961 | 12.6% | 1.00[Reference] |  |  |
| 25-28 | 78/472 | 16.5% | 1.36(1.07-1.74) | **0.013** |  | 19/169 | 11.8% | 0.91(0.56-1.48) | 0.782 | 0.149 |
| ≥28 | 36/163 | 22.1% | 1.93(1.37-2.71) | **<0.001** |  | 6/72 | 8.3% | 0.62(0.25-1.51) | 0.260 | **0.020** |
| **Paternal BMI** |  |  |  |  |  |  |  |  |  |  |
| <18.5 | 5/70 | 7.1% | 0.58(0.24-1.40) | 0.227 |  | 4/33 | 12.1% | 0.97(0.31-3.09) | 0.962 | 0.486 |
| 18.5-25 | 325/2562 | 12.7% | 1.00[Reference] |  |  | 80/747 | 10.7% | 1.00[Reference] |  |  |
| 25-28 | 146/991 | 14.7% | 1.16(0.96-1.42) | 0.127 |  | 43/353 | 12.2% | 1.12(0.77-1.64) | 0.543 | 0.873 |
| ≥28 | 45/420 | 10.7% | 0.84(0.61-1.15) | 0.268 |  | 24/183 | 13.1% | 1.35(0.85-2.14) | 0.203 | 0.094 |
| **Infertility type** |  |  |  |  |  |  |  |  |  |  |
| Primary | 268/2165 | 12.4% | 1.00[Reference] |  |  | 69/616 | 11.2% | 1.00[Reference] |  |  |
| Secondary | 253/1935 | 13.1% | 0.99(0.83-1.18) | 0.876 |  | 66/531 | 12.4% | 1.00(0.70-1.43) | 0.989 | 0.935 |
| **COH protocole** |  |  |  |  |  |  |  |  |  |  |
| GnRH-a long protocol | 274/2311 | 11.9% | 1.00[Reference] |  |  | 117/1095 | 10.7% | 1.00[Reference] |  |  |
| GnRH-a short protocol | 171/1448 | 11.8% | 0.90(0.73-1.10) | 0.304 |  | 15/125 | 12.0% | 0.89(0.50-1.59) | 0.686 | 0.967 |
| GnRH antagonist protocol | 35/95 | 36.8% | 3.36(2.35-4.80) | **<0.001** |  | 0/0 | NA | NA | NA | NA |
| Minimal stimulation protocol | 29/111 | 26.1% | 2.03(1.36-3.02) | **<0.001** |  | 15/75 | 20.0% | 1.47(0.81-2.68) | 0.208 | 0.379 |
| GnRH-a rolonged protocol | 11/108 | 10.2% | 0.84(0.46-1.53) | 0.563 |  | 1/15 | 6.7% | 0.68(0.10-4.91) | 0.705 | 0.847 |
| Other protocol | 2/4 | 50.0% | 5.40(1.34-21.71) | **0.017** |  | 3/9 | 33.3% | 3.16(0.99-10.03) | 0.051 | 0.561 |
| **The total Gn dosec** |  |  |  |  |  |  |  |  |  |  |
| <1808.01 | 272/2344 | 11.6% | 1.00[Reference] |  |  | 101/837 | 12.1% | 1.00[Reference] |  |  |
| ≥1808.01 | 251/1725 | 14.6% | 1.23(1.03-1.46) | **0.020** |  | 50/483 | 10.4% | 0.74(0.52-1.06) | 0.097 | **0.012** |
| **Fertilization methods** |  |  |  |  |  |  |  |  |  |  |
| IVF | 472/3641 | 13.0% | 1.00[Reference] |  |  | 107/902 | 11.9% | 1.00[Reference] |  |  |
| ICSI | 54/457 | 11.8% | 0.90(0.68-1.19) | 0.449 |  | 44/418 | 10.5% | 0.91(0.63-1.30) | 0.600 | 0.958 |
| **Cycle type** |  |  |  |  |  |  |  |  |  |  |
| Fresh | 225/2202 | 10.2% | 1.00[Reference] |  |  | 57/473 | 12.1% | 1.00[Reference] |  |  |
| Frozen | 243/1630 | 14.9% | 1.49(1.24-1.78) | **<0.001** |  | 94/847 | 11.1% | 0.90(0.65-1.27) | 0.558 | **0.011** |
| **No. of embryos transferred** |  |  |  |  |  |  |  |  |  |  |
| 1 | 75/442 | 17.0% | 1.00[Reference] |  |  | 7/32 | 21.9% | 1.00[Reference] |  |  |
| 2 | 380/3088 | 12.3% | 0.76(0.59-0.97) | **0.030** |  | 136/1236 | 11.0% | 0.48(0.22-1.04) | 0.063 | 0.275 |
| 3 | 76/585 | 13.0% | 0.67(0.49-0.93) | **0.017** |  | 8/52 | 15.4% | 0.58(0.21-1.60) | 0.291 | 0.780 |
| Ptrend |  |  | 0.82(0.69-0.97) | **0.018** |  |  |  | 0.78(0.42-1.45) | 0.440 | 0.897 |
| **Cleavage-stage embryo or blastocyste** |  |  |  |  |  |  |  |  |  |  |
| cleavage-stage embryo | 315/2540 | 12.4% | 1.00[Reference] |  |  | 151/1320 | 11.4% |  |  |  |
| blastocyst | 198/1405 | 14.1% | 1.08(0.99-1.18) | 0.092 |  |  |  |  |  |  |
| **Serum hCG levels 14 days after transferd** |  |  |  |  |  |  |  |  |  |  |
| <695.30 | 224/1598 | 14.0% | 1.00[Reference] |  |  | 110/607 | 18.1% | 1.00[Reference] |  |  |
| ≥695.30 | 75/1283 | 5.8% | 0.39(0.30-0.51) | **<0.001** |  | 40/705 | 5.7% | 0.29(0.20-0.43) | **<0.001** | 0.208 |

a Adjusted for maternal age.

*b*Heterogeneity test for differences between Nanjing and Changzhou.

cThe cutoff value was the mean of total Gn dose in cycle.

dThe cutoff value was the mean of serum hCG levels 14 days after transfer.

eGnRH antagonist protocol was not utilized in Changzhou, and they only transferred cleavage-stage embryos.
